# Supplementary material for: Estimating Consumers’ Knowledge and Attitudes Towards Over-The-Counter Analgesic Medication in Greece in the Years of Financial Crisis: The Case of Paracetamol
Source: PubMed Central journal article supplement — Pain Ther. 2015 Dec 22;5(1):19–28. doi: 10.1007/s40122-015-0042-x (PMC4912963; doi:10.1007/s40122-015-0042-x), 2015-12-22
Supplement: 40122_2015_42_MOESM1_ESM.pdf [file 40122_2015_42_MOESM1_ESM.pdf]

## **SUPPLEMENTARY MATERIAL**

A translated version of the questionnaire which was presented to the participants in Greek.

### **QUESTIONNAIRE ON KNOWLEDGE AND ATTITUDES TOWARDS PARACETAMOL USE AMONG THE GREEK POPULATION**

Please fill in the questions that follow. We thank you for your co-operation.

**GENDER:** .....

**AGE:** .....

#### **EDUCATIONAL BACKGROUND**

- A. Middle School graduate
- B. High School graduate
- C. University graduate
- D. Postgraduate or PhD
- E. Healthcare professional

**1. Which of the following medications do you believe contains paracetamol as the main active compound?**

- A. DEPON
- B. PANADOL
- C. PONSTAN
- D. ASPIRIN
- E. MESULID
- F. VOLTAREN
- G. APOTEL
- H. BUSCOPAN PLUS
- I. LONARID

**2. How often do you use paracetamol?**

- A. Every day
- B. Two times per week
- C. Once per week
- D. Once per month
- E. It depends on my demands

**3. Which was the reason you used paracetamol recently?**

- A. Headache
- B. Arthralgia
- C. Cold and flu
- D. Fever
- E. Dizziness
- F. Other (please specify): .....

**4. The last time that used paracetamol, what was the dosage?**

- A. One pill
- B. 2–3 pills per day
- C. One pill every day for 3–4 days
- D. One pill every day for one week
- E. One pill every day for more than one week

**5. Who recommended the use of paracetamol the last time that you used it?**

- A. My physician
- B. My physician in a similar situation in the past
- C. My pharmacist
- D. One of my close relatives
- E. A friend of mine

**6. Do you know what the maximum allowed daily dose of paracetamol is?**

- A. 500 mg
- B. 1 g
- C. 3 g
- D. 4 g
- E. 5 g

**7. Where do you get information about paracetamol?**

- A. My friends and relatives
- B. My physician
- C. My pharmacist
- D. Internet (webpages)
- E. Advertisements on TV/Internet

**8. How often do you use analgesics on your own (without a doctor's prescription)?**

- A. Every day
- B. 2–3 times per week
- C. Once per week
- D. Once per month
- E. Other (please specify): .....

**9. Do you consume alcohol after the use of paracetamol?**

- A. Never
- B. Yes, after 2–3 hours of treatment
- C. Yes

**10. For patients under chronic treatment only: Do you contact your physician before the use of paracetamol?**

- A. No
- B. Sometimes I will call the doctor
- C. Only when I visit the doctor
- D. Never

**11. For patients under chronic treatment only: Do you discuss with your pharmacist before the use of paracetamol?**

- A. No
- B. Sometimes
- C. Only if he/she asks
- D. Always
- E. I find it redundant

**12. Do you believe that chronic use of paracetamol can cause side effects?**

- A. No
- B. Yes

**13. If paracetamol was freely available in the market (other than the pharmacy, e.g., supermarket, etc.), would you purchase it from such places?**

- A. Yes
- B. Yes, if I was in a hurry
- C. In some cases, if I have already bought from pharmacy once
- D. No, since I would like to have expert advice
- E. No, since I'm not sure if they have been stored in the appropriate way

**14. After drinking alcohol, would you consume analgesics?**

- A. Yes
- B. No
