# Supplementary material for: Estimating Consumers’ Knowledge and Attitudes Towards Over-The-Counter Analgesic Medication in Greece in the Years of Financial Crisis: The Case of Paracetamol
Source: PubMed Central journal article supplement — Pain Ther. 2015 Dec 22;5(1):19–28. doi: 10.1007/s40122-015-0042-x (PMC4912963; doi:10.1007/s40122-015-0042-x), 2015-12-22
Supplement: 40122_2015_42_MOESM2_ESM.pdf [file 40122_2015_42_MOESM2_ESM.pdf]

## *Why carry out this study?*

- Paracetamol is the most widely used medication in the Greek market.
- This was the first pharmacoepidemiological study on over-the-counter medication in Greece during the years of the financial crisis.
- Generic paracetamol products were more well-known than the original.

## *What was learned from the study?*

- A significant percentage of participants confuse certain medicines (mainly non-steroidal anti-inflammatory drugs) with paracetamol, and age, level of education, and gender seem to predict this false belief.
- Interestingly, 11.1% of participants believed that the maximum allowed daily dose of paracetamol was higher than the correct one.
- Better educated individuals were less likely to consume alcohol in parallel with paracetamol.

This summary slide represents the opinions of the authors. No funding or sponsorship was received for this study or publication of this article. For a full list of acknowledgments and disclosures for all authors of this article, please see the full text online. © The Author(s) 2015. Creative Commons Attribution Noncommercial License (CC BY-NC).
